# Supplementary material for: Association between Preexisting Sleep Disorders and Oncologic Outcome in Patients with Oral Cavity Squamous Cell Carcinoma: A Nationwide Propensity Score—Matched Population-Based Cohort Study
Source: MDPI journal article supplement (doi:10.3390/cancers14143420), 2022-07-14
Supplement: s1 [file s1]

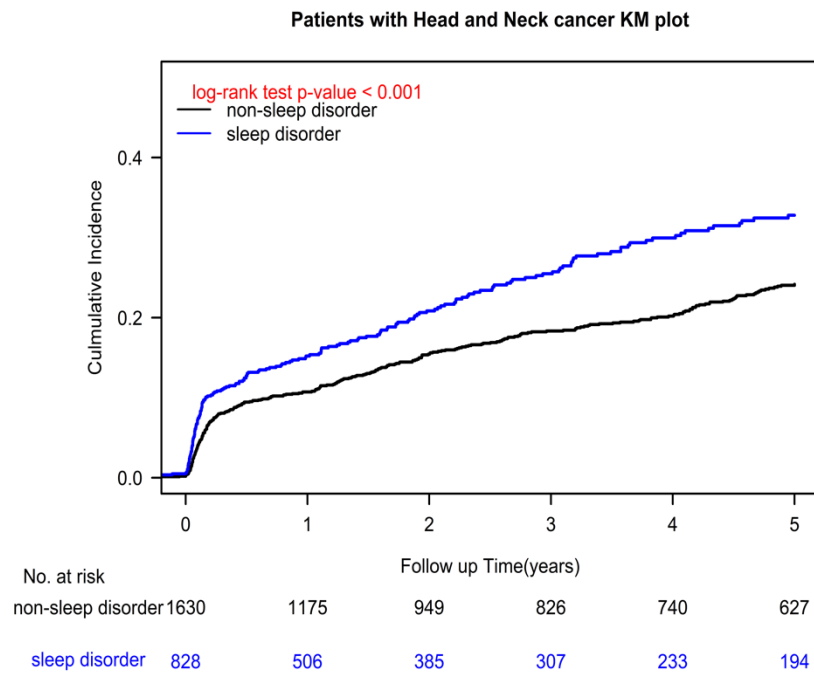

**Supplemental Figure S1.** Kaplan–Meier cumulative locoregional recurrence curves of propensity score–matched patients with oral cavity squamous cell carcinoma with and without sleep disorders.

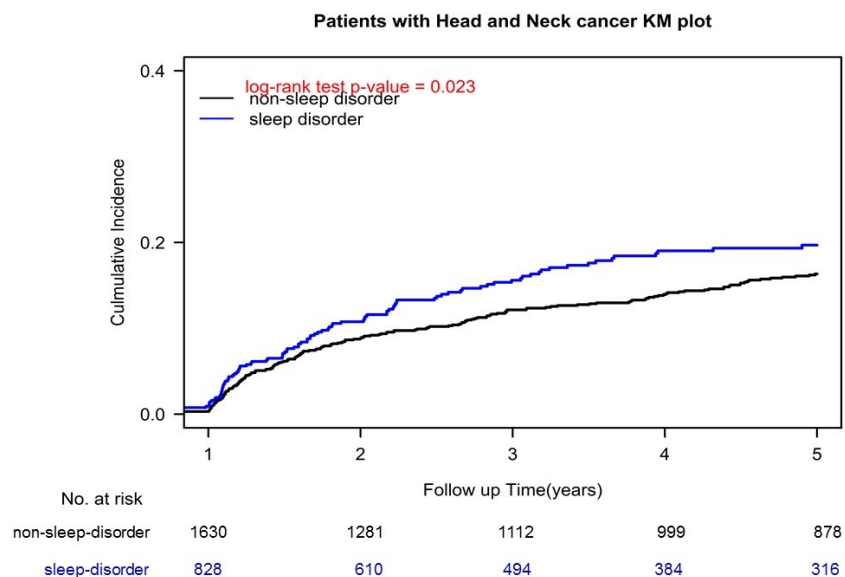

**Supplemental Figure S2.** Kaplan–Meier cumulative distant metastasis curves of propensity score–matched patients with oral cavity squamous cell carcinoma with and without sleep disorders.
